# Supplementary material for: Evaluation of adverse clinical outcomes in patients with inflammatory bowel disease receiving different sequences of first- and second-line biologic treatments: findings from ROTARY
Source: Springer Nature journal article supplement (doi:10.1186/s12876-024-03378-6), 2024-09-17
Supplement: MOESM1 [file 12876_2024_3378_MOESM1_ESM.docx]

# Supplementary Material

## Supplementary Table 1 Patient attrition for the Crohn’s disease cohort

| Criterion | | Remaining | | Excluded | |
| --- | --- | --- | --- | --- | --- |
| ***n*** | **%** | ***n*** | **%** |
| Evidence of treatment | ≥1 prescription or administration of a biologica during the patient identification period [January 1, 2013 to February 29, 2020] | 150,631 | – | – | – |
| Receiving only one biologic on initial therapy date | 150,506 | 99.9 | 125 | 0.1 |
| EHR activity | EHR activity before the start of the baseline period [365 days before the index date] | 127,931 | 85.0 | 22,575 | 15.0 |
| CD diagnosis | ≥2 diagnoses of CD during the baseline periodb | 19,960 | 15.6 | 107,971 | 84.4 |
| ≥1 diagnosis of CD during the follow-up period | 19,447 | 97.4 | 513 | 2.6 |
| New start | Exclusion: ≥1 prescription or administration of a biologica during the baseline period | 16,421 | 84.4 | 3026 | 15.6 |
| No other conditions | Exclusion: ≥1 diagnosis for rheumatoid arthritis, psoriatic arthritis, ankylosing spondylitis, plaque psoriasis, hidradenitis suppurativa, or noninfectious uveitis in the 6 months before the index date | 15,743 | 95.9 | 678 | 4.1 |
| Adult | ≥18 years old at index date with valid demographic information | 13,661 | 86.8 | 2082 | 13.2 |
| At least two qualifying lines of therapy | ≥1 prescription or administration of second biologica following the first biologic | 3028 | 22.2 | 10,633 | 77.8 |
| Monotherapy during second line of treatment | 3008 | 99.3 | 20 | 0.7 |
| Treatment sequences | ADA to IFX, IFX to ADA, VDZ to ADA, VDZ to IFX, UST to ADA, UST to IFX | 1273 | 42.3 | 1735 | 57.7 |

ADA, adalimumab; CD, Crohn’s disease; EHR, electronic health record; IFX, infliximab; UC, ulcerative colitis; UST, ustekinumab; VDZ, vedolizumab. aBiologics included were adalimumab, ustekinumab, infliximab, or vedolizumab. bFor patients with diagnoses of both CD and UC, the number of consecutive diagnoses during the baseline period was used to classify patients; ≥3 consecutive UC diagnoses after CD diagnosis and ≥3 CD diagnoses after UC diagnosis were used to classify UC and CD correctly

## Supplementary Table 2 Patient attrition for the ulcerative colitis cohort

| Criterion | | Remaining | | Excluded | |
| --- | --- | --- | --- | --- | --- |
| ***n*** | **%** | ***n*** | **%** |
| Evidence of treatment | ≥1 prescription or administration of a biologica during the patient identification period [January 1, 2013 to February 29, 2020] | 150,631 | – | – | – |
| Receiving only one biologic on initial therapy date | 150,506 | 99.9 | 125 | 0.1 |
| EHR activity | EHR activity before the start of the baseline period [365 days before the index date] | 127,931 | 85.0 | 22,575 | 15.0 |
| UC diagnosis | ≥2 diagnoses of UC during the baseline periodb | 9451 | 7.4 | 118,480 | 92.6 |
| ≥1 diagnosis of UC during the follow-up period | 9049 | 95.7 | 402 | 4.3 |
| New start | Exclusion: ≥1 prescription or administration of a biologica during the baseline period | 8186 | 90.5 | 863 | 9.5 |
| No other conditions | Exclusion: ≥1 diagnosis for rheumatoid arthritis, psoriatic arthritis, ankylosing spondylitis, plaque psoriasis, hidradenitis suppurativa, or noninfectious uveitis in the 6 months before the index date | 7893 | 96.4 | 293 | 3.6 |
| Adult | ≥18 years old at index date with valid demographic information | 7123 | 90.2 | 770 | 9.8 |
| At least two qualifying lines of therapy | ≥1 prescription or administration of second biologica following the first biologic | 1654 | 23.2 | 5469 | 76.8 |
| Monotherapy during second line of treatment | 1640 | 99.2 | 14 | 0.8 |
| Treatment sequences | ADA to IFX, IFX to ADA, VDZ to ADA, VDZ to IFX | 779 | 47.5 | 861 | 52.5 |

ADA, adalimumab; CD, Crohn’s disease; EHR, electronic health record; IFX, infliximab; UC, ulcerative colitis; UST, ustekinumab; VDZ, vedolizumab. aBiologics included were adalimumab, ustekinumab, infliximab, or vedolizumab. bFor patients with diagnoses of both CD and UC, the number of consecutive diagnoses during the baseline period was used to classify patients; ≥3 consecutive UC diagnoses after CD diagnosis and ≥3 CD diagnoses after UC diagnosis were used to classify UC and CD correctly
